# Supplementary material for: Intensity of Local Skin Reactions During 5-Fluorouracil Treatment Related to the Number of Actinic Keratosis Lesions: A Post Hoc, Exploratory Analysis
Source: PubMed Central journal article supplement — Dermatol Ther (Heidelb). 2021 Dec 26;12(2):467–79. doi: 10.1007/s13555-021-00668-9 (PMC8850465; doi:10.1007/s13555-021-00668-9), 2021-12-26
Supplement: 13555_2021_668_MOESM1_ESM.pdf [file 13555_2021_668_MOESM1_ESM.pdf]

**Intensity of Local Skin Reactions During 5-Fluorouracil Treatment Related to the Number of Actinic Keratosis Lesions: A Post-hoc, Exploratory Analysis**

**Authors:** Eggert Stockfleth,<sup>1</sup> Nathalie Bégeault,<sup>2</sup> Alain Delarue<sup>2</sup>

**Affiliations:** <sup>1</sup>Department of Dermatology, Ruhr-University Bochum, Gudrunstraße 56 - D 44791 Bochum, Germany; <sup>2</sup>Pierre Fabre Dermatologie, Les Cauquillous, F 81500 Lavaur, France

**Corresponding author:** Prof Eggert Stockfleth, Standort St. Josef-Hospital, Gudrunstraße 56,

D 44791 Bochum, Germany. Email: [eggert.stockfleth@klinikum-bochum.de](mailto:eggert.stockfleth@klinikum-bochum.de)

## Supplementary Materials

**Supplementary Table 1.** Severity of A) erythema, B) oedema, C) scaling, D) crusting, E) erosion, F) pruritus and G) stinging after 4 weeks of treatment for actinic keratosis with 5-fluorouracil 4% cream in patient groups categorised according to the number of actinic keratosis lesions at baseline (pooled safety populations from Study HD-FUP3B-048 and Study HD-FUP3B-049).

|                      | Number of actinic keratosis lesions at baseline |                 |                 |                 |                 |               |
|----------------------|-------------------------------------------------|-----------------|-----------------|-----------------|-----------------|---------------|
|                      | <5<br>(N=27)                                    | 5–10<br>(N=157) | 11–15<br>(N=83) | 16–20<br>(N=50) | 21–25<br>(N=32) | >25<br>(N=54) |
| Severity of erythema |                                                 |                 |                 |                 |                 |               |
| None                 | 12.50                                           | 0.69            | 1.35            | 0               | 0               | 0             |
| Mild                 | 16.67                                           | 24.14           | 13.51           | 15.56           | 13.33           | 7.84          |
| Moderate             | 45.83                                           | 46.90           | 44.59           | 35.56           | 40.00           | 41.18         |
| Severe               | 25.00                                           | 28.28           | 40.54           | 48.89           | 46.67           | 50.98         |
| Severity of oedema   |                                                 |                 |                 |                 |                 |               |
| None                 | 37.50                                           | 44.14           | 36.49           | 42.22           | 26.67           | 23.53         |
| Mild                 | 41.67                                           | 37.24           | 35.14           | 37.78           | 20.00           | 29.41         |
| Moderate             | 16.67                                           | 15.86           | 22.97           | 17.78           | 40.00           | 33.33         |
| Severe               | 4.17                                            | 2.76            | 5.41            | 2.22            | 13.33           | 13.73         |

Severity of scaling

|          |       |       |       |       |       |       |
|----------|-------|-------|-------|-------|-------|-------|
| None     | 25.00 | 15.17 | 9.46  | 2.22  | 6.67  | 1.96  |
| Mild     | 25.00 | 40.00 | 39.19 | 33.33 | 16.67 | 23.53 |
| Moderate | 37.50 | 33.10 | 39.19 | 35.56 | 43.33 | 37.25 |
| Severe   | 12.50 | 11.72 | 12.16 | 28.89 | 33.33 | 37.25 |

Severity of crusting

|          |       |       |       |       |       |       |
|----------|-------|-------|-------|-------|-------|-------|
| None     | 37.50 | 27.59 | 16.22 | 15.56 | 6.67  | 7.84  |
| Mild     | 29.17 | 35.17 | 33.78 | 24.44 | 33.33 | 27.45 |
| Moderate | 25.00 | 23.45 | 33.78 | 42.22 | 33.33 | 31.37 |
| Severe   | 8.33  | 13.79 | 16.22 | 17.78 | 26.67 | 33.33 |

Severity of erosions

|          |       |       |       |       |       |       |
|----------|-------|-------|-------|-------|-------|-------|
| None     | 50.00 | 46.21 | 32.43 | 28.89 | 26.67 | 33.33 |
| Mild     | 16.67 | 31.03 | 37.84 | 31.11 | 23.33 | 19.61 |
| Moderate | 29.17 | 16.55 | 24.32 | 31.11 | 26.67 | 27.45 |
| Severe   | 4.17  | 6.21  | 5.41  | 8.89  | 23.33 | 19.61 |

Severity of pruritus

|          |       |       |       |       |       |       |
|----------|-------|-------|-------|-------|-------|-------|
| None     | 41.67 | 29.66 | 16.22 | 8.89  | 13.33 | 19.61 |
| Mild     | 41.67 | 37.24 | 44.59 | 31.11 | 33.33 | 29.41 |
| Moderate | 12.50 | 26.21 | 24.32 | 37.78 | 46.67 | 21.57 |

|                      |       |       |       |       |       |       |
|----------------------|-------|-------|-------|-------|-------|-------|
| Severe               | 4.17  | 6.90  | 14.86 | 22.22 | 6.67  | 29.41 |
| Severity of stinging |       |       |       |       |       |       |
| None                 | 33.33 | 36.55 | 16.22 | 8.89  | 10.00 | 17.65 |
| Mild                 | 41.67 | 24.83 | 36.49 | 22.22 | 33.33 | 19.61 |
| Moderate             | 20.83 | 23.45 | 28.38 | 46.67 | 40.00 | 29.41 |
| Severe               | 4.17  | 15.17 | 18.92 | 22.22 | 16.67 | 33.33 |

---

Data are % of patients.

Local skin reactions were assessed at week 2 and week 4; week 4 data are shown here. Local skin reactions were graded as a visual average across all treated areas using a 4-point numerical scale: 0 (none; no evidence of reaction), 1 (mild; faintly detectable reaction), 2 (moderate; clearly distinguishable reaction) or 3 (severe; marked/extensive/bothersome reaction).
